# Supplementary material for: Sub-Inhibitory Concentrations of Oxacillin, but Not Clindamycin, Linezolid, or Tigecycline, Decrease Staphylococcal Phenol-Soluble Modulin Expression in Community-Acquired Methicillin-Resistant Staphylococcus aureus
Source: PubMed Central journal article supplement (PMC8768629; doi:10.1128/spectrum.00808-21), 2022-01-19

## Supplementary data

Figure S1: Effects of antibiotic sub-MIC on toxin release, A/ Hld, B/ PSM $\alpha$ 1, at 6-h incubation for community-acquired methicillin-resistant *S. aureus* according to the clone (ST 80 European clone on the left, ST8 USA 300 on the right). The results for each antibiotic corresponding to different sub-MIC concentrations were pooled for the 2 strains belonging to the same genetic background. The results are expressed in percentage related to growth control without antibiotic (= 100%) represented by the dotted gray line. When possible, conformity t tests were performed to compare the expression with and without antibiotic. If not, N.D. is indicated. Comparison of HLD release between both clones for OXA performed using the Welch test. 1 point corresponds to 1 value (orange circle for LUG1799T; green triangle for ST20121288; blue square for SF8300; purple cross for HT20060752). CLI: clindamycin, LIN: linezolid, OXA: oxacillin, TIG: tigecycline, \*  $p < 0.05$ , \*\*  $p < 0.01$ , \*\*\*  $p < 0.001$ . N.T.: not testable.

A

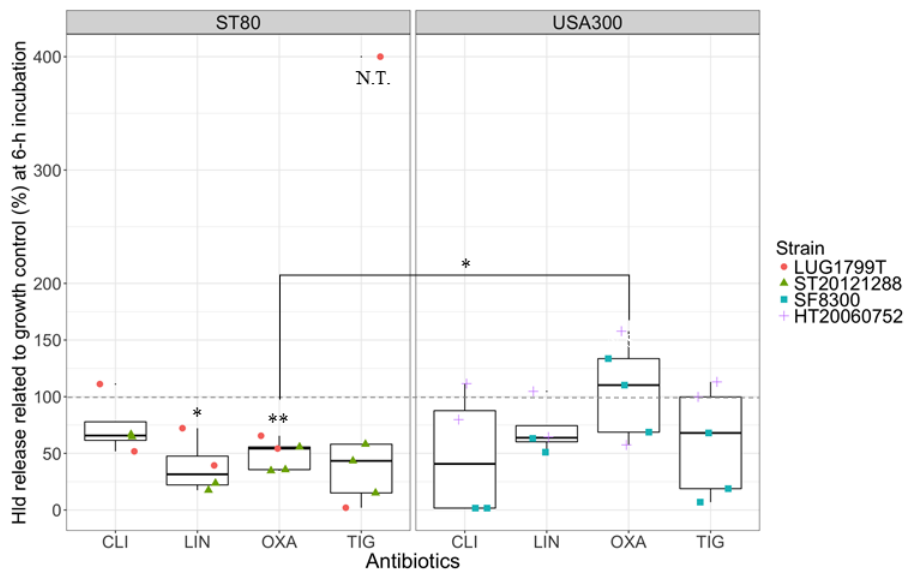

B

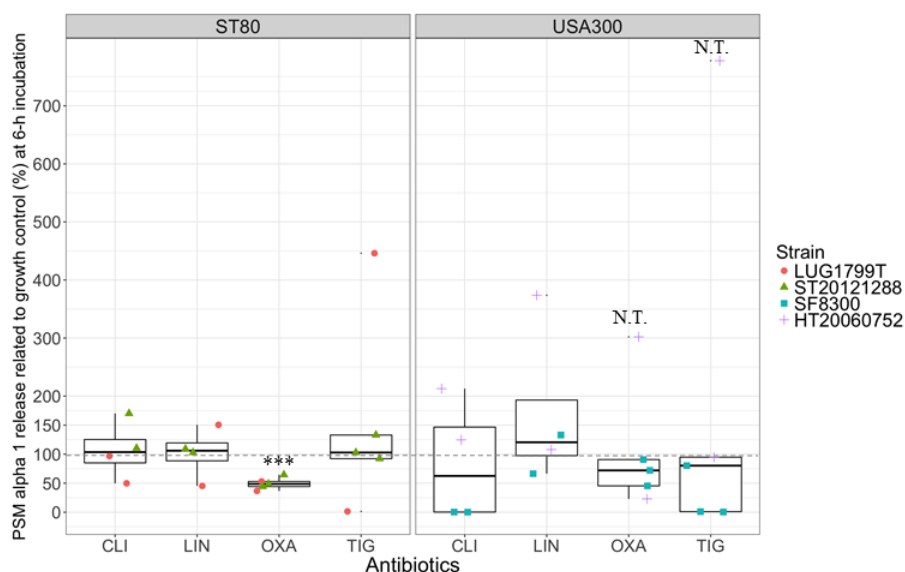

Figure S2: Effects of antibiotic sub-MIC on *psma1* mRNA expression at 6-h incubation according to the clone (ST 80 European clone on the left, ST8 USA 300 in the right), pooling the different sub-MIC concentrations for one antibiotic. The results are expressed as n-fold differences in the  $psm\alpha1/gyrb$  ratio in the presence of antibiotics relative to the control growth condition (i.e. without antibiotics, = 1) represented by the dotted gray line. When possible, conformity t tests were performed to compare the expression with and without antibiotics. If not, N.D. is indicated. 1 point corresponds to 1 value (orange circle for LUG1799T; green triangle for ST20121288; blue square for SF8300; purple cross for HT20060752). CLI: clindamycin, LIN: linezolid, OXA: oxacillin, TIG: tigecycline, \*  $p < 0.05$ , N.T.: not testable.

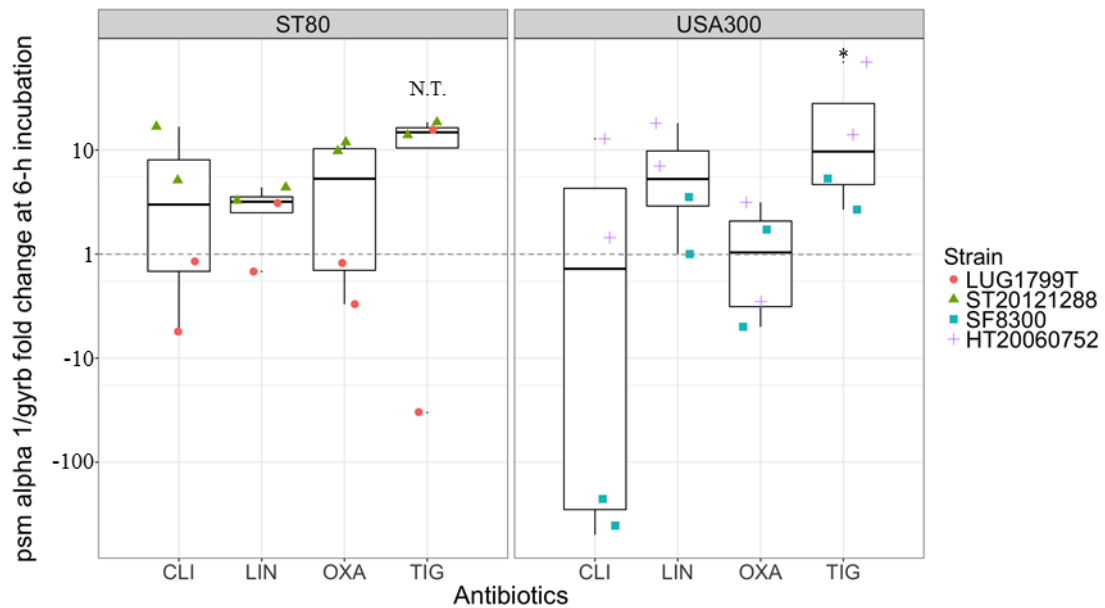

Figure S3: Growth curves for community-acquired methicillin-resistant *S. aureus*. Growth control: without antibiotics. A/ SF8300; B/ HT20060752; C/ LUG1799T; D/ ST20121288. CLI: clindamycin, LIN: linezolid, OXA: oxacillin, TIG: tigecycline, MIC = minimum inhibitory concentration.

A/

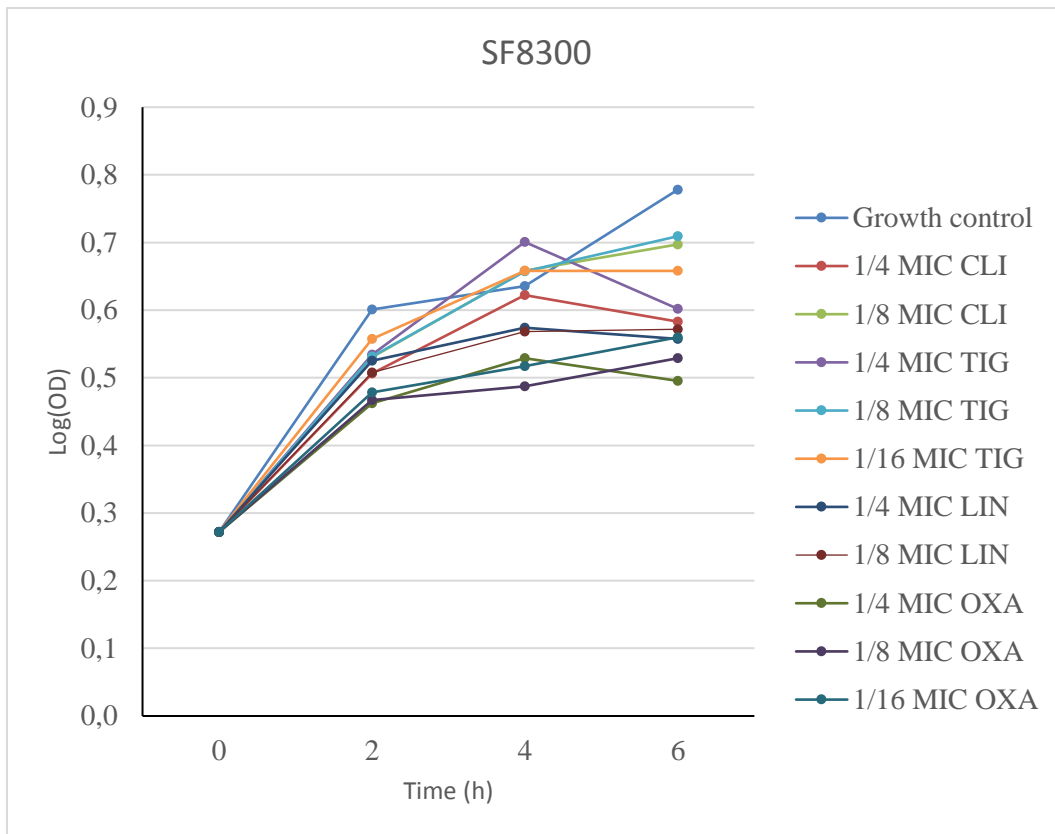

B/

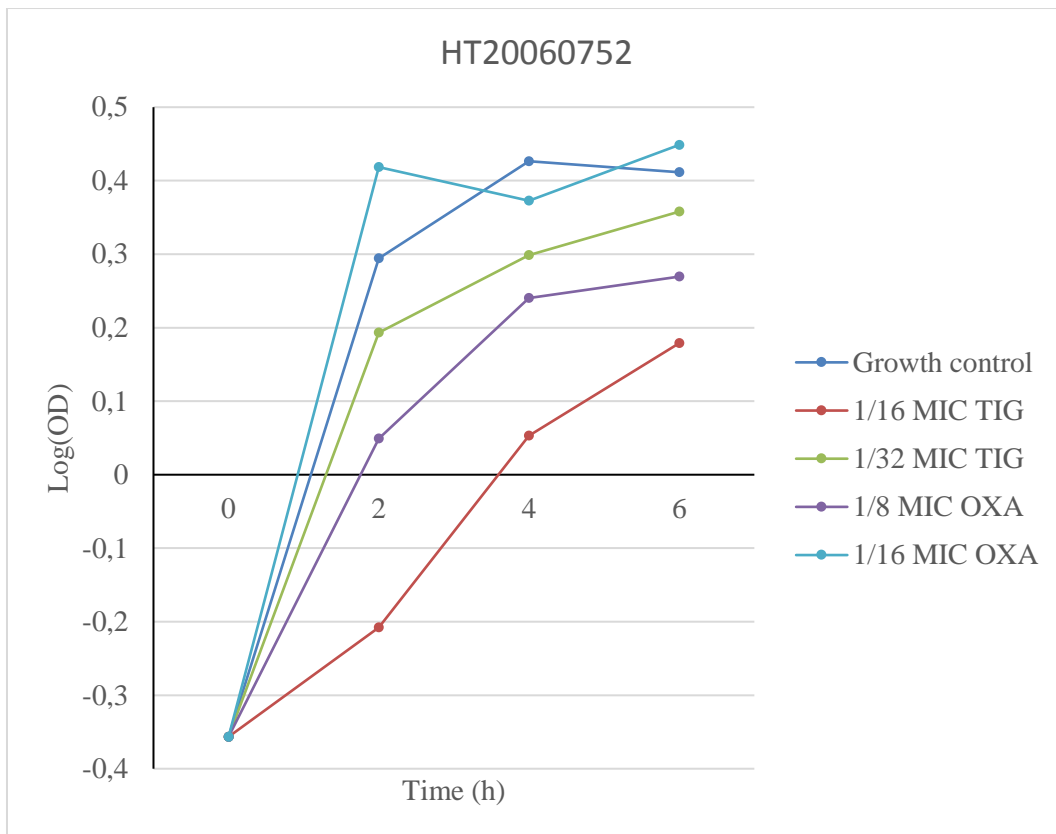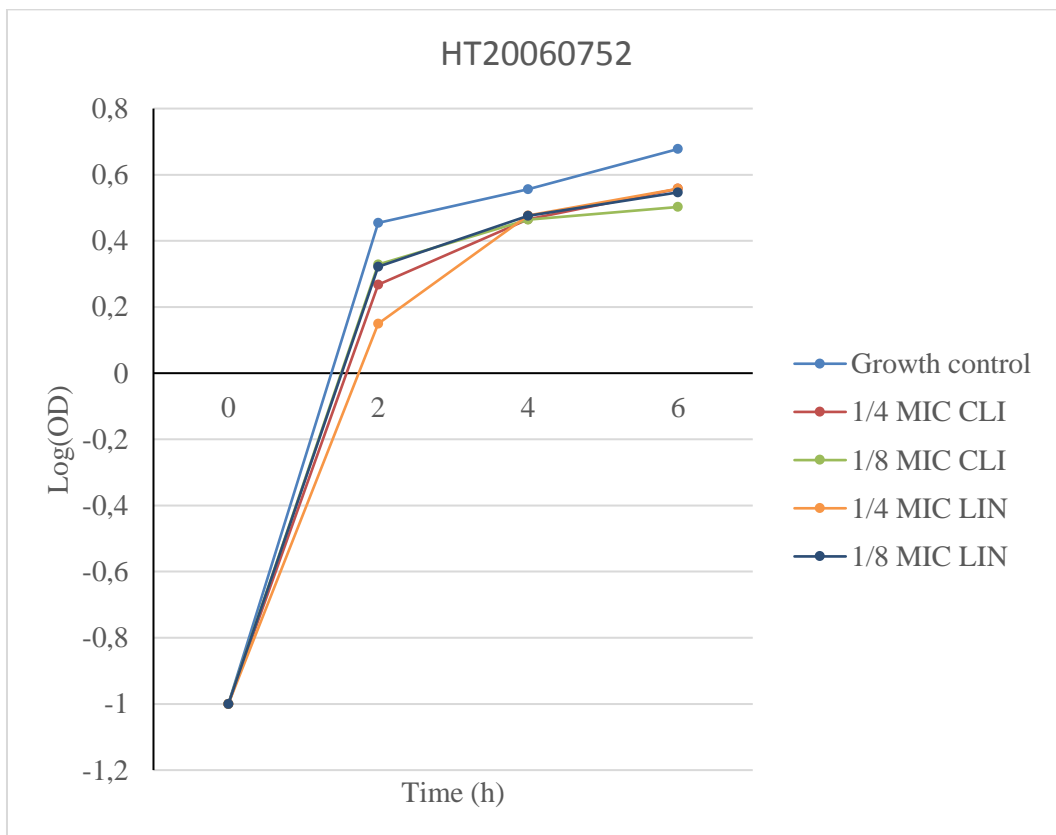

C/

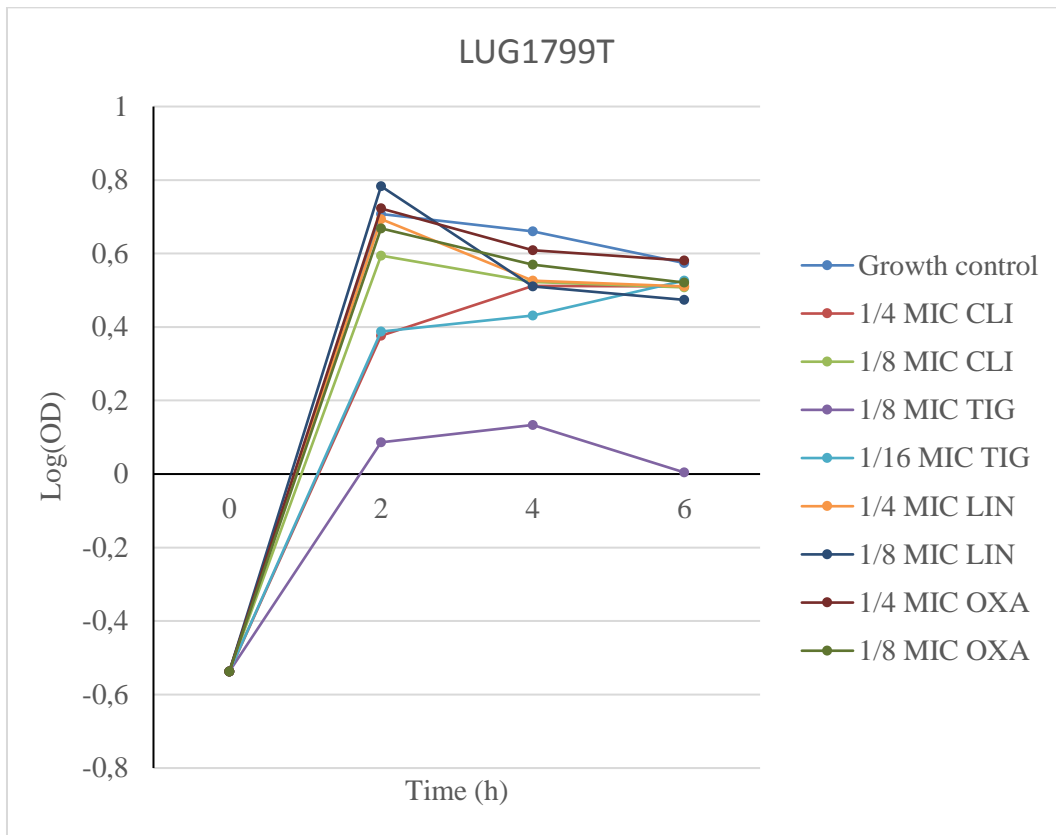

D/

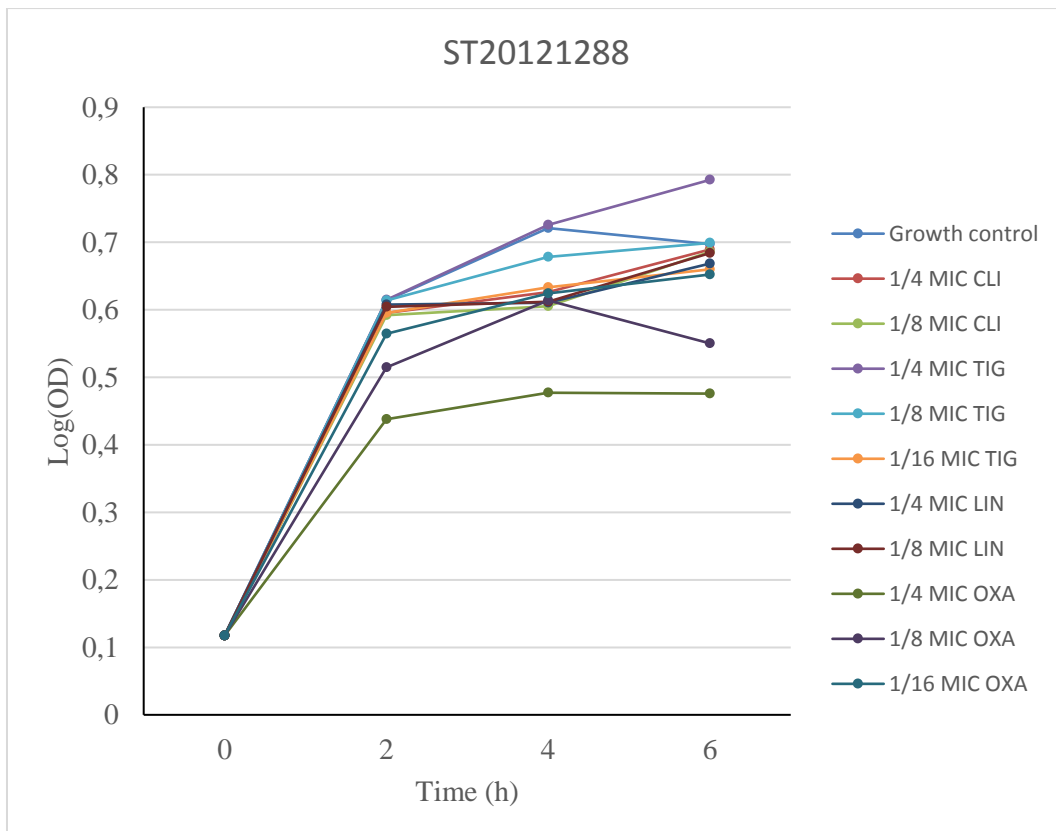

Supplement: spectrum00808-21_supp_1_seq9.pdf [file spectrum00808-21_supp_1_seq9.pdf]
